# Supplementary material for: Mechanisms of Action and Clinical Development of Elotuzumab
Source: PubMed Central journal article supplement — Clin Transl Sci. 2017 Dec 22;11(3):261–6. doi: 10.1111/cts.12532 (PMC5944582; doi:10.1111/cts.12532), 2017-12-22
Supplement: CTS-11-261-s001.pdf [file CTS-11-261-s001.pdf]

**TAYLOR & FRANCIS LICENSE  
TERMS AND CONDITIONS**

Jul 21, 2017

---

This Agreement between MCCANN COMPLETE MEDICAL -- Jackie Marchington ("You") and Taylor & Francis ("Taylor & Francis") consists of your license details and the terms and conditions provided by Taylor & Francis and Copyright Clearance Center.

The publisher has provided special terms related to this request that can be found at the end of the Publisher's Terms and Conditions.

**All payments must be made in full to CCC. For payment instructions, please see information listed at the bottom of this form.**

|                                                                          |                                                                                                     |
|--------------------------------------------------------------------------|-----------------------------------------------------------------------------------------------------|
| License Number                                                           | 4153520980889                                                                                       |
| License date                                                             | Jul 21, 2017                                                                                        |
| Licensed Content Publisher                                               | Taylor & Francis                                                                                    |
| Licensed Content Publication                                             | Expert Opinion on Biological Therapy                                                                |
| Licensed Content Title                                                   | Update on elotuzumab, a novel anti-SLAMF7 monoclonal antibody for the treatment of multiple myeloma |
| Licensed Content Author                                                  | Sagar Lonial, Jonathan Kaufman, Donna Reece, et al                                                  |
| Licensed Content Date                                                    | Oct 2, 2016                                                                                         |
| Licensed Content Volume                                                  | 16                                                                                                  |
| Licensed Content Issue                                                   | 10                                                                                                  |
| Type of Use                                                              | Journal/Magazine                                                                                    |
| Requestor type                                                           | academic/educational                                                                                |
| Format                                                                   | print and electronic                                                                                |
| Portion                                                                  | Figure/table/questionnaire                                                                          |
| Number of figures/tables /questionnaires                                 | 1                                                                                                   |
| Figure identification                                                    | Figure 1. Elotuzumab mechanism of action. Page 1733                                                 |
| Will you be translating?                                                 | no                                                                                                  |
| Circulation                                                              | 2000                                                                                                |
| Does Taylor & Francis material represent more than 20% of your new work. | no                                                                                                  |
| Author of this Taylor & Francis article                                  | no                                                                                                  |
| Order reference number                                                   | BMG76999_JT                                                                                         |
| Title of the article                                                     | Bench to Bedside Development of Elotuzumab as Immunotherapy in Myeloma                              |
| Publication the new article is in                                        | Clinical and Translational Science                                                                  |

|                           |                                                                                                                                                  |
|---------------------------|--------------------------------------------------------------------------------------------------------------------------------------------------|
| Publisher of the article  | Wiley                                                                                                                                            |
| Author of new article     | David Ritchie and Marco Colonna                                                                                                                  |
| Expected publication date | Oct 2017                                                                                                                                         |
| Requestor Location        | MCCANN COMPLETE MEDICAL<br>1st Floor, Seacourt Tower<br>West Way<br>Botley<br>Oxford, other OX2 0JJ<br>United Kingdom<br>Attn: Dr JM Marchington |
| Publisher Tax ID          | GB365462636                                                                                                                                      |
| Customer VAT ID           | null                                                                                                                                             |
| Billing Type              | Invoice                                                                                                                                          |
| Billing Address           | MCCANN COMPLETE MEDICAL<br>1st Floor, Seacourt Tower<br>Botley<br><br>Oxford, United Kingdom OX2 0JJ<br>Attn: McCann Complete Medical Ltd        |
| Customer reference info   | BMG76999_JT                                                                                                                                      |
| End Client Company Name   | David Ritchie and Marco Colonna (authors)                                                                                                        |
| End Client Email Address  | joanne.tang@caudex.com                                                                                                                           |
| Price                     | 472.50 USD                                                                                                                                       |
| Tax/VAT (20%)             | 94.50 USD                                                                                                                                        |
| Total                     | 567.00 USD                                                                                                                                       |

#### Terms and Conditions

### **Taylor and Francis: Terms and Conditions for Reuse in a Book/Textbook, Journal/Magazine, Promotional Materials/Pamphlet/Brochure, Newspaper and Newsletter**

Permission is granted for a fee for non exclusive world rights for one edition only. Use beyond this edition requires obtaining another license. This license is granted strictly according to the details of use you specified during the order process and are found in the order details above.

Unless otherwise stated, entire article electronic reuse is excluded with the exception of eBooks.

This license does not cover usage in a Custom Publishing Programme and or database. This license does not cover individual chapter sales.

This license does not cover cases in which Taylor and Francis material consists of more than 20% of your new work.

This permission does not cover any third party copyrighted work which may appear in the material requested.

Full acknowledgement must be included showing article title, author, full Journal title, date of publication and publisher, reprinted by permission of the publisher (Taylor & Francis Ltd, <http://www.tandfonline.com>).

All reasonable efforts must be made to contact the author(s) to notify them of your intentions and confirm they are happy with the permission being granted.

No alterations may be made to our work without written consent.

Permission is valid only when payment has been received.

Permission is granted by Copyright Clearance Center Inc (CCC) on Taylor and Francis's behalf and by agreeing to the terms and conditions listed above you also agree to (CCC's) additional terms and conditions as the administrators of this licensing service, these terms and conditions are agreed to as a condition of establishing an account and may be seen at any time at <http://myaccount.copyright.com>.

### **Special Conditions**

The following terms only apply to signatories of the International Association of Scientific, Technical and Medical (STM) Publishers guidelines. <http://www.stm-assoc.org/about-stm>. Taylor and Francis adheres to STM guidelines, providing some reuse licenses for free as specified in the guidelines. We are pleased to grant you non exclusive world rights in English and in all languages, in print and electronic editions of this Work in its first and future editions and revisions, on the following conditions:

The original source of publication and Taylor & Francis Ltd., are acknowledged in the caption, including a reference to the Journal's web site: <http://www.informaworld.com>

You do not license to any third party permission to reproduce this copyrighted material, in any form, and at any time.

This permission does not cover any third party copyrighted work which may appear in the material requested.

**Other Terms and Conditions:** None

v1.9

**You will be invoiced within 48 hours of this transaction date. You may pay your invoice by credit card upon receipt of the invoice for this transaction. Please follow instructions provided at that time.**

**To pay for this transaction now; please remit a copy of this document along with your payment. Payment should be in the form of a check or money order referencing your account number and this invoice number RLNK502388852.**

**Make payments to "COPYRIGHT CLEARANCE CENTER" and send to:**

**Copyright Clearance Center  
29118 Network Place  
Chicago, IL 60673-1291**

**Please disregard electronic and mailed copies if you remit payment in advance**

**Questions? [customercare@copyright.com](mailto:customercare@copyright.com) or +1-855-239-3415 (toll free in the US) or +1-978-646-2777.**

---

---
