# Supplementary material for: Mechanisms of Action and Clinical Development of Elotuzumab
Source: PubMed Central journal article supplement — Clin Transl Sci. 2017 Dec 22;11(3):261–6. doi: 10.1111/cts.12532 (PMC5944582; doi:10.1111/cts.12532), 2017-12-22
Supplement: CTS-11-261-s002.pdf [file CTS-11-261-s002.pdf]

**MASSACHUSETTS MEDICAL SOCIETY LICENSE  
TERMS AND CONDITIONS**

Jul 21, 2017

---

This Agreement between MCCANN COMPLETE MEDICAL -- Jackie Marchington ("You") and Massachusetts Medical Society ("Massachusetts Medical Society") consists of your license details and the terms and conditions provided by Massachusetts Medical Society and Copyright Clearance Center.

**All payments must be made in full to CCC. For payment instructions, please see information listed at the bottom of this form.**

|                                   |                                                                            |
|-----------------------------------|----------------------------------------------------------------------------|
| License Number                    | 4153521391056                                                              |
| License date                      | Jul 21, 2017                                                               |
| Licensed Content Publisher        | Massachusetts Medical Society                                              |
| Licensed Content Publication      | The New England Journal of Medicine                                        |
| Licensed Content Title            | Elotuzumab Therapy for Relapsed or Refractory Multiple Myeloma             |
| Licensed Content Author           | Sagar Lonial, Meletios Dimopoulos, Antonio Palumbo, et al                  |
| Licensed Content Date             | Aug 13, 2015                                                               |
| Licensed Content Volume           | 373                                                                        |
| Licensed Content Issue            | 7                                                                          |
| Type of Use                       | Journal/Magazine                                                           |
| Requestor type                    | academic/educational                                                       |
| Portion                           | figure/table                                                               |
| Number of figures/tables          | 1                                                                          |
| Include high res file(s) delivery | no                                                                         |
| Format                            | print and electronic                                                       |
| Will you be translating?          | no                                                                         |
| Circulation                       | 115329                                                                     |
| Distributing to                   | Worldwide                                                                  |
| Order reference number            | BMG76999_JT                                                                |
| Title of the article              | Bench to Bedside Development of Elotuzumab as Immunotherapy in Myeloma     |
| Publication the new article is in | Clinical and Translational Science                                         |
| Publisher of the article          | Wiley                                                                      |
| Author of new article             | David Ritchie and Marco Colonna                                            |
| Expected publication date         | Oct 2017                                                                   |
| Requestor Location                | MCCANN COMPLETE MEDICAL<br>1st Floor, Seacourt Tower<br>West Way<br>Botley |

|                          |                                                                                                                                           |
|--------------------------|-------------------------------------------------------------------------------------------------------------------------------------------|
|                          | Oxford, other OX2 0JJ<br>United Kingdom<br>Attn: Dr JM Marchington                                                                        |
| Customer VAT ID          | null                                                                                                                                      |
| Billing Type             | Invoice                                                                                                                                   |
| Billing Address          | MCCANN COMPLETE MEDICAL<br>1st Floor, Seacourt Tower<br>Botley<br><br>Oxford, United Kingdom OX2 0JJ<br>Attn: McCann Complete Medical Ltd |
| Customer reference info  | BMG76999_JT                                                                                                                               |
| End Client Company Name  | David Ritchie and Marco Colonna (authors)                                                                                                 |
| End Client Email Address | joanne.tang@caudex.com                                                                                                                    |
| Total                    | 98.70 USD                                                                                                                                 |
| Terms and Conditions     |                                                                                                                                           |

### Introduction

The publisher for this copyrighted content is Massachusetts Medical Society ("MMS"). By clicking "accept" in connection with completing this licensing transaction, you agree that the following terms and conditions apply (along with the Billing and Payment terms and conditions established by Copyright Clearance Center, Inc. ("CCC"), at the time that you opened your RightsLink account and that are available at any time at <http://myaccount.copyright.com>).

### Scope of License

1. MMS hereby grants to you a non-exclusive license to reproduce the aforementioned content subject to the terms and conditions indicated within the RightsLink transaction. Licenses are for one-time use only. Web posting is limited to the time period selected within your transaction - beginning on the date of this license.
2. This grant of permission is for the content to be used without alteration, as originally published by MMS. However, minor formatting and stylistic changes are permitted, provided that any explanatory material or figure legend that you use accurately reflects the content as originally published by MMS. MMS does not approve adaptations or modifications.
3. MMS's copyrighted content may not be used in any manner that implies endorsement, sponsorship, or promotion of any entity, product or service by the MMS or its publications. MMS cannot and does not authorize the use of any author's name on promotional materials; such approval must be obtained directly from the author.
4. This permission is granted for English language rights only unless your license specifically grants translation rights. If translation rights are granted, the content must be reproduced word for word with the integrity and original meaning of the content preserved.
5. If your license specifically grants "expanded rights," permission is granted to reproduce the aforementioned content in a primary work and related materials created to supplement or add value to it, such as: ancillaries, instructor guides, testing materials, and student resource materials.
6. MMS reserves all rights not specifically granted in the combination of (i) the license details provided by you and accepted in the course of this licensing transaction, (ii) these terms and conditions and (iii) CCC's Billing and Payment terms and conditions.

**Acknowledgement**

7. This permission requires suitable acknowledgement of the source, either as a footnote, in a reference list, or adjacent to where the MMS content appears. The credit line should read as follows:

"From [Publication Title, Author(s), Title of Article, Volume No., Page No. Copyright © (notice year) Massachusetts Medical Society. Reprinted with permission from Massachusetts Medical Society."

**General Terms**

8. Warranties. MMS makes no representations or warranties with respect to the licensed content.

9. Indemnity. You hereby indemnify and agree to hold harmless the MMS and CCC, and their respective officers, directors, employees, members and agents, from and against any and all claims arising out of your use of the licensed content other than as specifically authorized by this license.

10. No Transfer of License. This license is personal to you and may not be sublicensed, assigned, or transferred by you to any other person or entity without permission from MMS.

11. No Amendment Except in Writing. This license may not be amended except in a writing signed by both parties.

12. Objection to Contrary Terms. MMS hereby objects to any terms contained in any purchase order, acknowledgment, check endorsement or other writing prepared by you, which terms are inconsistent with these terms and conditions or CCC's Billing and Payment terms and conditions. These terms and conditions, together with CCC's Billing and Payment terms and conditions (which are incorporated herein), comprise the entire agreement between you and publisher (and CCC) concerning this licensing transaction. In the event of any conflict between your obligations established by these terms and conditions and those established by CCC's Billing and Payment terms and conditions, these terms and conditions shall control.

13. License Contingent on Payment. While you may exercise the rights licensed immediately upon issuance of the license at the end of the licensing process for the transaction, provided that you have disclosed complete and accurate details of your proposed use, no license is finally effective unless and until full payment is received from you (either by MMS or by CCC) as provided in CCC's Billing and Payment terms and conditions. If full payment is not received on a timely basis, then any license preliminarily granted shall be deemed automatically revoked and shall be void as if never granted. Further, in the event that you breach any of these terms and conditions or any of CCC's Billing and Payment terms and conditions, the license is automatically revoked and shall be void as if never granted. Use of content as described in a revoked license, as well as any use of the content beyond the scope of an unrevoked license, may constitute copyright infringement and MMS reserves the right to take any and all action to protect its copyright in the content.

14. This license transaction shall be governed by and construed in accordance with the laws of the Commonwealth of Massachusetts. You hereby agree to submit to the jurisdiction of the federal and state courts located in Boston, MA for purposes of resolving any dispute that may arise in connection with this licensing transaction.

**Restrictions**

15. This permission applies only to content of the MMS, and not to copyrighted content from any other source. If content appears in our work with credit to another source, you must also obtain permission from that source.

16. This permission does not apply to and is not valid for photographs depicting identifiable individuals.

Other Terms and Conditions:

5\_16\_12\_v1.0

**You will be invoiced within 48 hours of this transaction date. You may pay your invoice by credit card upon receipt of the invoice for this transaction. Please follow instructions provided at that time.**

**To pay for this transaction now; please remit a copy of this document along with your payment. Payment should be in the form of a check or money order referencing your account number and this invoice number RLNK502388860.**

**Make payments to "COPYRIGHT CLEARANCE CENTER" and send to:**

**Copyright Clearance Center**

**29118 Network Place**

**Chicago, IL 60673-1291**

**Please disregard electronic and mailed copies if you remit payment in advance**

**Questions? [customercare@copyright.com](mailto:customercare@copyright.com) or +1-855-239-3415 (toll free in the US) or +1-978-646-2777.**
