# Supplementary material for: Mechanisms of Action and Clinical Development of Elotuzumab
Source: PubMed Central journal article supplement — Clin Transl Sci. 2017 Dec 22;11(3):261–6. doi: 10.1111/cts.12532 (PMC5944582; doi:10.1111/cts.12532), 2017-12-22
Supplement: CTS-11-261-s003.pdf [file CTS-11-261-s003.pdf]

**NATURE PUBLISHING GROUP LICENSE  
TERMS AND CONDITIONS**

Jul 17, 2017

This Agreement between MCCANN COMPLETE MEDICAL -- Jackie Marchington ("You") and Nature Publishing Group ("Nature Publishing Group") consists of your license details and the terms and conditions provided by Nature Publishing Group and Copyright Clearance Center.

|                                                 |                                                                                                                                                                                                  |
|-------------------------------------------------|--------------------------------------------------------------------------------------------------------------------------------------------------------------------------------------------------|
| License Number                                  | 4151340480231                                                                                                                                                                                    |
| License date                                    | Jul 17, 2017                                                                                                                                                                                     |
| Licensed Content Publisher                      | Nature Publishing Group                                                                                                                                                                          |
| Licensed Content Publication                    | Leukemia                                                                                                                                                                                         |
| Licensed Content Title                          | Long-term follow-up on overall survival from the MM-009 and MM-010 phase III trials of lenalidomide plus dexamethasone in patients with relapsed or refractory multiple myeloma                  |
| Licensed Content Author                         | M A Dimopoulos, C Chen, A Spencer, R Niesvizky, M Attal et al.                                                                                                                                   |
| Licensed Content Date                           | Jul 23, 2009                                                                                                                                                                                     |
| Licensed Content Volume                         | 23                                                                                                                                                                                               |
| Licensed Content Issue                          | 11                                                                                                                                                                                               |
| Type of Use                                     | reuse in a journal/magazine                                                                                                                                                                      |
| Requestor type                                  | academic/university or research institute                                                                                                                                                        |
| Format                                          | print and electronic                                                                                                                                                                             |
| Portion                                         | figures/tables/illustrations                                                                                                                                                                     |
| Number of figures/tables/illustrations          | 2                                                                                                                                                                                                |
| High-res required                               | no                                                                                                                                                                                               |
| Figures                                         | Figure 2 (The Kaplan–Meier estimate of progression-free survival for the intent-to-treat population) Figure 3 (The Kaplan–Meier estimate of overall survival for the intent-to-treat population) |
| Author of this NPG article                      | no                                                                                                                                                                                               |
| Your reference number                           | BMG76999_JT                                                                                                                                                                                      |
| Title of the article                            | Bench to Bedside Development of Elotuzumab as Immunotherapy in Myeloma                                                                                                                           |
| Publication the new article is in               | Clinical and Translational Science                                                                                                                                                               |
| Publisher of your article                       | Wiley                                                                                                                                                                                            |
| Author of the article                           | David Ritchie and Marco Colonna                                                                                                                                                                  |
| Expected publication date                       | Oct 2017                                                                                                                                                                                         |
| Estimated size of new article (number of pages) | 8                                                                                                                                                                                                |
| Requestor Location                              | MCCANN COMPLETE MEDICAL<br>1st Floor, Seacourt Tower<br>West Way<br>Botley<br>Oxford, other OX2 0JJ<br>United Kingdom<br>Attn: Dr JM Marchington                                                 |
| Customer VAT ID                                 | null                                                                                                                                                                                             |
| Billing Type                                    | Invoice                                                                                                                                                                                          |
| Billing Address                                 | MCCANN COMPLETE MEDICAL<br>1st Floor, Seacourt Tower<br>Botley<br><br>Oxford, United Kingdom OX2 0JJ<br>Attn: McCann Complete Medical Ltd                                                        |
| Total                                           | 0.00 USD                                                                                                                                                                                         |

[Terms and Conditions](#)

Terms and Conditions for Permissions

Nature Publishing Group hereby grants you a non-exclusive license to reproduce this material for this purpose, and for no other use, subject to the conditions below:

1. NPG warrants that it has, to the best of its knowledge, the rights to license reuse of this material. However, you should ensure that the material you are requesting is original to Nature Publishing Group and does not carry the copyright of another entity (as credited in the published version). If the credit line on any part of the material you have requested indicates that it was reprinted or adapted by NPG with permission from another source, then you should also seek permission from that source to reuse the material.
2. Permission granted free of charge for material in print is also usually granted for any electronic version of that work, provided that the material is incidental to the work as a whole and that the electronic version is essentially equivalent to, or substitutes for, the print version. Where print permission has been granted for a fee, separate permission must be obtained for any additional, electronic re-use (unless, as in the case of a full paper, this has already been accounted for during your initial request in the calculation of a print run). NB: In all cases, web-based use of full-text articles must be authorized separately through the 'Use on a Web Site' option when requesting permission.
3. Permission granted for a first edition does not apply to second and subsequent editions and for editions in other languages (except for signatories to the STM Permissions Guidelines, or where the first edition permission was granted for free).
4. Nature Publishing Group's permission must be acknowledged next to the figure, table or abstract in print. In electronic form, this acknowledgement must be visible at the same time as the figure/table/abstract, and must be hyperlinked to the journal's homepage.
5. The credit line should read:  
Reprinted by permission from Macmillan Publishers Ltd: [JOURNAL NAME] (reference citation), copyright (year of publication)  
For AOP papers, the credit line should read:  
Reprinted by permission from Macmillan Publishers Ltd: [JOURNAL NAME], advance online publication, day month year (doi: 10.1038/sj.[JOURNAL ACRONYM].XXXXX)

**Note: For republication from the *British Journal of Cancer*, the following credit lines apply.**

Reprinted by permission from Macmillan Publishers Ltd on behalf of Cancer Research UK: [JOURNAL NAME] (reference citation), copyright (year of publication) For AOP papers, the credit line should read:  
Reprinted by permission from Macmillan Publishers Ltd on behalf of Cancer Research UK: [JOURNAL NAME], advance online publication, day month year (doi: 10.1038/sj.[JOURNAL ACRONYM].XXXXX)

6. Adaptations of single figures do not require NPG approval. However, the adaptation should be credited as follows:

Adapted by permission from Macmillan Publishers Ltd: [JOURNAL NAME] (reference citation), copyright (year of publication)

**Note: For adaptation from the *British Journal of Cancer*, the following credit line**

**applies.**

Adapted by permission from Macmillan Publishers Ltd on behalf of Cancer Research UK:  
[JOURNAL NAME] (reference citation), copyright (year of publication)

7. Translations of 401 words up to a whole article require NPG approval. Please visit <http://www.macmillanmedicalcommunications.com> for more information. Translations of up to a 400 words do not require NPG approval. The translation should be credited as follows:

Translated by permission from Macmillan Publishers Ltd: [JOURNAL NAME] (reference citation), copyright (year of publication).

**Note: For translation from the *British Journal of Cancer*, the following credit line applies.**

Translated by permission from Macmillan Publishers Ltd on behalf of Cancer Research UK:  
[JOURNAL NAME] (reference citation), copyright (year of publication)

We are certain that all parties will benefit from this agreement and wish you the best in the use of this material. Thank you.

Special Terms:

v1.1

Questions? [customercare@copyright.com](mailto:customercare@copyright.com) or +1-855-239-3415 (toll free in the US) or +1-978-646-2777.

---

---
